# Supplementary material for: Who bears the cost of forest conservation?
Source: PubMed Central journal article supplement (PMC6035863; doi:10.7717/peerj.5106), 2018-07-05

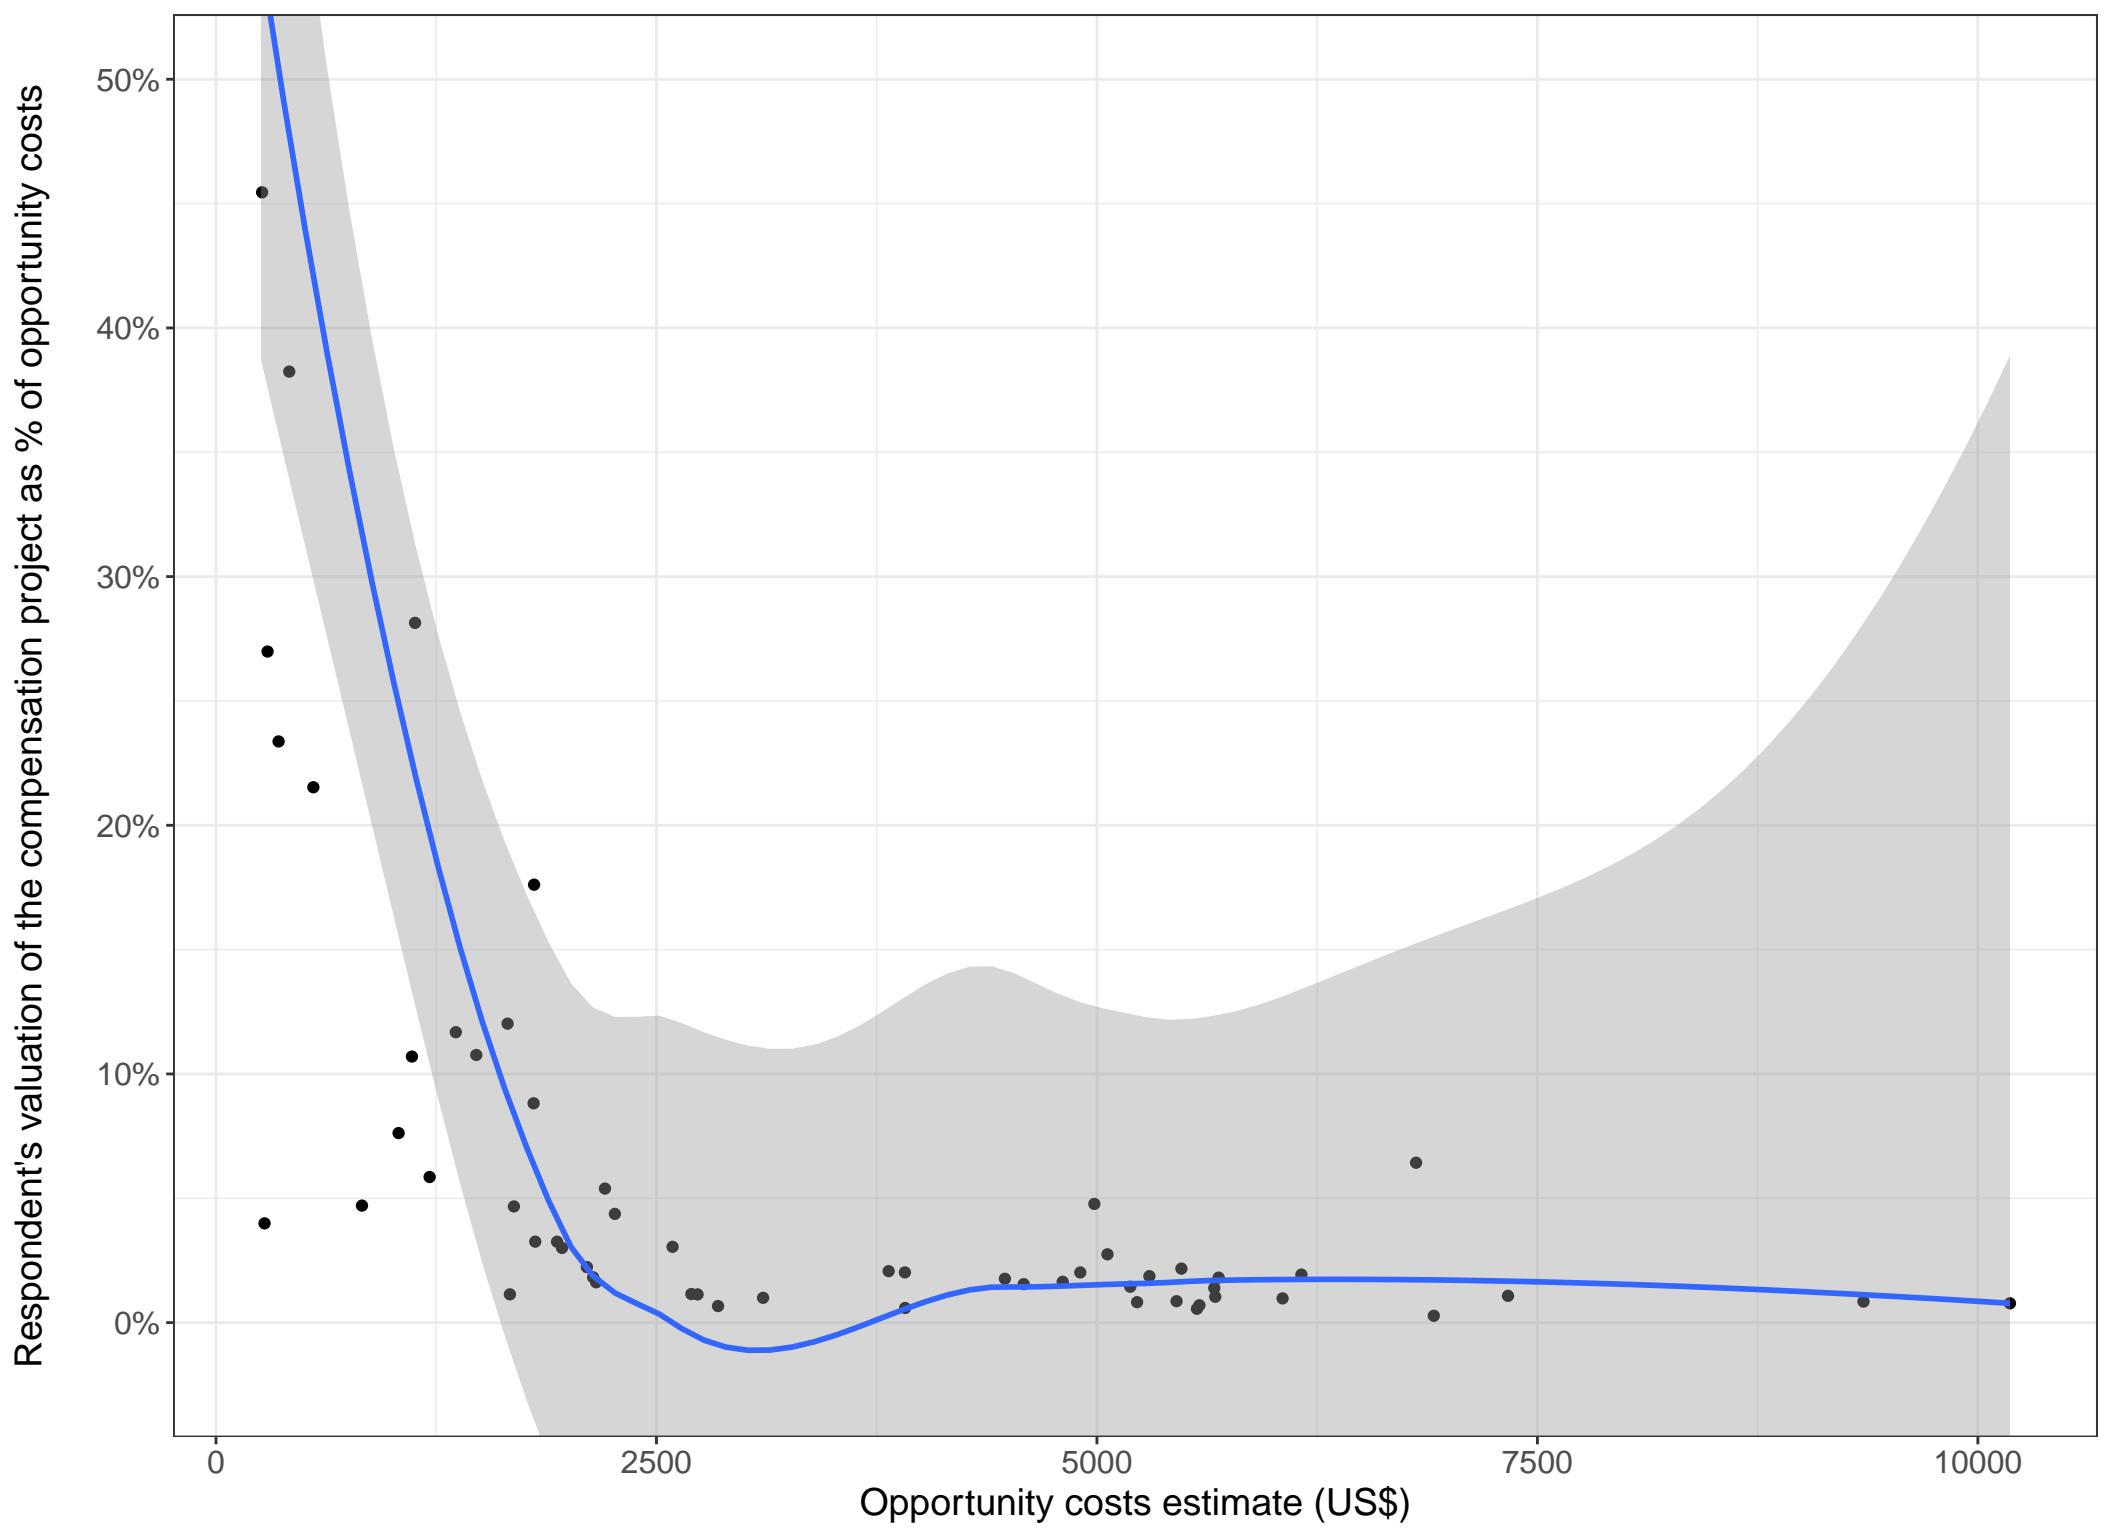

Supplement: peerj-06-5106-s002.pdf [file peerj-06-5106-s002.pdf]
