# Supplementary material for: Who bears the cost of forest conservation?
Source: PubMed Central journal article supplement (PMC6035863; doi:10.7717/peerj.5106), 2018-07-05

**ALTERNATIVES**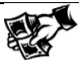

Total cash payments ( $10^6$  MGA)

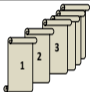

Number of installments

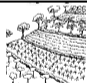

Technical rice farming

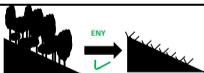

Teviala option

**Choice**

**A** $3 \times 10^6$ 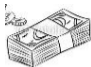**10**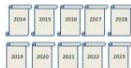**YES**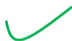

YES BUT only on  
**1ha**

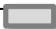**B** $6 \times 10^6$ 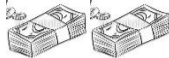**20**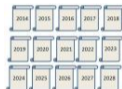**NO****X****NO****X**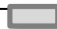**C (reference level)**

NONE

-

**NO****X**

YES

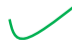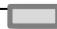

Supplement: peerj-06-5106-s006.pdf [file peerj-06-5106-s006.pdf]
