# Supplementary material for: Who bears the cost of forest conservation?
Source: PubMed Central journal article supplement (PMC6035863; doi:10.7717/peerj.5106), 2018-07-05
Supplement: peerj-06-5106-s012.pdf [file peerj-06-5106-s012.pdf]

**Supplementary materials: Who bears  
the cost of forest conservation?**

**Survey instruments for phase two of  
data collection: the agricultural survey**

We present the survey instruments  
used (in English as well as Malagasy)

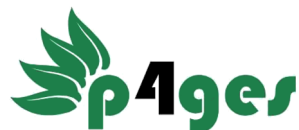

can paying 4 global ecosystem services reduce poverty?

les paiements pour les services écosystémiques globaux peuvent-ils réduire la pauvreté?  
www.p4ges.org

Work Package 6: Agricultural Questionnaire Survey

Survey Information

| Activity/Task                     | Date | Start Time | End Time | Person(s) Responsible | Remarks |
|-----------------------------------|------|------------|----------|-----------------------|---------|
| Interview                         |      |            |          |                       |         |
| Checking Questionnaire            |      |            |          |                       |         |
| Coding Questionnaire              |      |            |          |                       |         |
| Data Entry                        |      |            |          |                       |         |
| Checking and Approving Data Entry |      |            |          |                       |         |

A. Identification

[Note: All the information in the table below, except for the name & PID of the respondents should be filled prior to the survey based on the initial HH survey data from the respective HH.]

|                                       |  |           |        |
|---------------------------------------|--|-----------|--------|
| 1. HH Name & Code                     |  | (name)    | (HHID) |
| 2. Village Name & Code                |  | (name)    | (VID)  |
| 3. Fokontany Name & Code              |  | (name)    | (FID)  |
| 4. Commune Name & Code                |  | (name)    | (CID)  |
| 5. District Name & Code               |  | (name)    | (DID)  |
| 6. Name & PID of primary respondent   |  | (name)    | (PID)  |
| 7. Name & PID of secondary respondent |  | (name)    | (PID)  |
| 8. GPS Location of the HH             |  | (Lat)     | (Lon)  |
| 9. Distance of HH from village centre |  | (Minutes) | (Km)   |

Respondent (s)

[Note: the respondent should normally be the HH head, but important additional information could be gained from talking to other adult respondents (e.g. Previous users of the land if inherited)]

[If suitable respondents are too old/infirm to walk to the plot, area measurements and inputs/outputs for latest year should be undertaken at plot with younger HH member, and plot history completed in HH dwelling]

[Notes on respondents here (if not HH head) i.e. who gave what information]



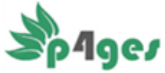

B. Land Ownership; Land Access; and Land Use

1. Information about land use

[Some of these information will have been obtained from the HH survey, and can be reproduced here. Interviewer should double check that these are all of the plots owned or used by the respondent]

| Field number | Site name | Distance from Dwelling | Estimated Size | Type                                                                              | Ownership/Access [For 'savoka', ask if the plot belongs solely to the HH or it is commonly held within the larger family or lineage] | Rented/Bought/Borrowed from?                                                                                       | Cost/Payment details for rented and bought plots |        | Cultivated in most recent agricultural year?                 | Plot Age                                                        | Rotation Period                                                                                            |
|--------------|-----------|------------------------|----------------|-----------------------------------------------------------------------------------|--------------------------------------------------------------------------------------------------------------------------------------|--------------------------------------------------------------------------------------------------------------------|--------------------------------------------------|--------|--------------------------------------------------------------|-----------------------------------------------------------------|------------------------------------------------------------------------------------------------------------|
|              |           |                        |                | (1=hill tavy; 2=flat tavy; 3=tanimbary; 4=tanimboly; 5=savoka; 6=other (specify)) | (1=inherited; 2=rented (specify); 3=bought (specify); 4=borrowed (specify); 5=cleared by the HH; 6=other (specify))                  | [If the plot is rented, bought, or borrowed, specify whether it is from the family or others] (1=family; 2=others) | Payment Type (Cash/Kind)                         | Amount | (whether the plot was cultivated in 2013/2014) (1=YES; 0=NO) | [Fill this later based on the plot-specific survey information] | (time between most recent cultivation) [if currently fallow, ask & record how long it has been fallow for] |
|              |           |                        |                |                                                                                   |                                                                                                                                      |                                                                                                                    |                                                  |        |                                                              |                                                                 |                                                                                                            |
|              |           |                        |                |                                                                                   |                                                                                                                                      |                                                                                                                    |                                                  |        |                                                              |                                                                 |                                                                                                            |
|              |           |                        |                |                                                                                   |                                                                                                                                      |                                                                                                                    |                                                  |        |                                                              |                                                                 |                                                                                                            |
|              |           |                        |                |                                                                                   |                                                                                                                                      |                                                                                                                    |                                                  |        |                                                              |                                                                 |                                                                                                            |
|              |           |                        |                |                                                                                   |                                                                                                                                      |                                                                                                                    |                                                  |        |                                                              |                                                                 |                                                                                                            |
|              |           |                        |                |                                                                                   |                                                                                                                                      |                                                                                                                    |                                                  |        |                                                              |                                                                 |                                                                                                            |
|              |           |                        |                |                                                                                   |                                                                                                                                      |                                                                                                                    |                                                  |        |                                                              |                                                                 |                                                                                                            |
|              |           |                        |                |                                                                                   |                                                                                                                                      |                                                                                                                    |                                                  |        |                                                              |                                                                 |                                                                                                            |
|              |           |                        |                |                                                                                   |                                                                                                                                      |                                                                                                                    |                                                  |        |                                                              |                                                                 |                                                                                                            |
|              |           |                        |                |                                                                                   |                                                                                                                                      |                                                                                                                    |                                                  |        |                                                              |                                                                 |                                                                                                            |
|              |           |                        |                |                                                                                   |                                                                                                                                      |                                                                                                                    |                                                  |        |                                                              |                                                                 |                                                                                                            |
|              |           |                        |                |                                                                                   |                                                                                                                                      |                                                                                                                    |                                                  |        |                                                              |                                                                 |                                                                                                            |
|              |           |                        |                |                                                                                   |                                                                                                                                      |                                                                                                                    |                                                  |        |                                                              |                                                                 |                                                                                                            |
|              |           |                        |                |                                                                                   |                                                                                                                                      |                                                                                                                    |                                                  |        |                                                              |                                                                 |                                                                                                            |
|              |           |                        |                |                                                                                   |                                                                                                                                      |                                                                                                                    |                                                  |        |                                                              |                                                                 |                                                                                                            |
|              |           |                        |                |                                                                                   |                                                                                                                                      |                                                                                                                    |                                                  |        |                                                              |                                                                 |                                                                                                            |
|              |           |                        |                |                                                                                   |                                                                                                                                      |                                                                                                                    |                                                  |        |                                                              |                                                                 |                                                                                                            |
|              |           |                        |                |                                                                                   |                                                                                                                                      |                                                                                                                    |                                                  |        |                                                              |                                                                 |                                                                                                            |
|              |           |                        |                |                                                                                   |                                                                                                                                      |                                                                                                                    |                                                  |        |                                                              |                                                                 |                                                                                                            |
|              |           |                        |                |                                                                                   |                                                                                                                                      |                                                                                                                    |                                                  |        |                                                              |                                                                 |                                                                                                            |

Remarks

2. Tavy System

[Note: Follow the pointers in each question carefully, especially on the 'YES/NO' questions as responses on those questions dictate which questions to ask and which ones to skip in this section.]

a. What limits the area of tavy land you cultivate each year?

[Prompt until no further factor is mentioned. Rank factors according to importance (top 3 only if more than 3 mentioned)]

| List of factors                                                           | Mark 'X' if Mentioned | Rank [THREE most important] |
|---------------------------------------------------------------------------|-----------------------|-----------------------------|
| Labour availability (HH labour/money to hire labour)                      |                       |                             |
| Access to fertilizer                                                      |                       |                             |
| Access to seed                                                            |                       |                             |
| Fertility of existing land                                                |                       |                             |
| Cannot get fresh land through teviaala: customary restrictions            |                       |                             |
| Cannot get fresh land through teviaala: government restrictions           |                       |                             |
| Cannot get fresh land through teviaala: land scarcity/population pressure |                       |                             |
|                                                                           |                       |                             |
|                                                                           |                       |                             |

b. What limits the productivity of the tavy land that you farm?

[Prompt until no further factor is mentioned. Rank factors according to importance (top 3 only if more than 3 mentioned)]

| List of factors              | Mark 'X' if Mentioned | Rank [THREE most important] |
|------------------------------|-----------------------|-----------------------------|
| Labour availability          |                       |                             |
| Access to fertilizer         |                       |                             |
| Access to seed               |                       |                             |
| Fertility of existing land   |                       |                             |
| Pests (mice, insects, birds) |                       |                             |
| Weeds                        |                       |                             |
| Rainfall                     |                       |                             |
|                              |                       |                             |
|                              |                       |                             |

c. Have you obtained additional land for tavy in the last 5 years?

[ ] YES >> go to '3.'

[ ] NO >> go to 'd.'

d. Have you considered obtaining additional land for tavy?

[ ] YES >> go to 'e.'

[ ] NO >> go to 'f.'

e. If YES, what are the main factors stopping you?

[Prompt until no further factor is mentioned. Rank factors according to importance (top 3 only if more than 3 mentioned)]

| List of factors                                      | Mark 'X' if Mentioned | Rank [THREE most important] |
|------------------------------------------------------|-----------------------|-----------------------------|
| There is no land for sale                            |                       |                             |
| Theer is no land to rent                             |                       |                             |
| I don't have enough labour to farm more land         |                       |                             |
| I don't have enough capital (money to buy/rent land) |                       |                             |
| I cannot do teviaala to obtain new land              |                       |                             |
| Immigrants are using land                            |                       |                             |
| Population of village is growing too much            |                       |                             |
|                                                      |                       |                             |
|                                                      |                       |                             |

f. If NO, why are you not considering obtaining additional land for tavy?

[Prompt until no further factor is mentioned. Rank factors according to importance (top 3 only if more than 3 mentioned)]

| List of factors                                      | Mark 'X' if Mentioned | Rank [THREE most important] |
|------------------------------------------------------|-----------------------|-----------------------------|
| There is no land for sale                            |                       |                             |
| Theer is no land to rent                             |                       |                             |
| I don't have enough labour to farm more land         |                       |                             |
| I don't have enough capital (money to buy/rent land) |                       |                             |
| I cannot do teviaala to obtain new land              |                       |                             |
|                                                      |                       |                             |
|                                                      |                       |                             |
|                                                      |                       |                             |

### 3. Tanimbary

[Note: Follow the pointers in each question carefully, especially on the 'YES/NO' questions as responses to those questions dictate which questions to ask and which ones to skip in this section.]

a. Do you have tanimbary plot(s)?

[ ] YES >> go to 'b.' [ ] NO >> go to 'l.'

b. Did you establish any of your Tanimbary plots within the last THREE years?

[ ] YES >> go to 'c.' [ ] NO >> go to 'e.'

c. If 'YES', which year? [Tick as appropriate]

[ ] 2012 [ ] 2013 [ ] 2014

d. What were the main one-off costs to your household in establishing this Tanimbary? >> go to 'h.'

| Categories                                                        | Costs                  |          |
|-------------------------------------------------------------------|------------------------|----------|
|                                                                   | Labour [total mandays] | Monetary |
| Land acquisition                                                  |                        |          |
| Land preparation (building bunds, terracing etc)                  |                        |          |
| Infrastructure (building canals, locks for water diversions etc.) |                        |          |
| Other costs (specify)                                             |                        |          |
| Other costs (specify)                                             |                        |          |
| Other costs (specify)                                             |                        |          |
| Other costs (specify)                                             |                        |          |

e. Have you recently increased the amount of tanimbary you have?

[ ] YES >> go to 'h.' [ ] NO >> go to 'f.'

f. Have you considered increasing it in the future?

[ ] YES >> go to 'h.' [ ] NO >> go to 'g.'

g. What are the main factors stopping you from increasing the area of tanimbary?

[prompt until no further factor is mentioned. Rank factors according to importance (top 3 only if more than 3 mentioned)]

| List of factors                   | Mark 'X' if Mentioned | Rank [THREE most important] |
|-----------------------------------|-----------------------|-----------------------------|
| Land availability                 |                       |                             |
| Labour availability               |                       |                             |
| Capital (money to buy/rent land)  |                       |                             |
| Too much water (flooding)         |                       |                             |
| Too little water (drought)        |                       |                             |
| Investment in barrages/irrigation |                       |                             |
| Skill/knowledge (fahaizana)       |                       |                             |
|                                   |                       |                             |
|                                   |                       |                             |
|                                   |                       |                             |

h. What crops do you plant in your tanimbary?

[For multiple tanimbary plots, mark all that apply]

- [ ] A single rice crop                                  [ ] 2 rice crops                                                  [ ] 3 rice crops  
 [ ] rice & a contra-season crop (name)                                  [ ] other combination(s) (specify)

i. Have you considered planting more crops per year?

- [ ] YES >> go to 'j.'  
 [ ] NO

j. If 'YES', what are the main reasons for not planting multiple crops per year?

[prompt until no further factor is mentioned. Rank factors according to importance (top 3 only if more than 3 mentioned)]

| List of factors            | Mark 'X' if Mentioned | Rank [THREE most important] |
|----------------------------|-----------------------|-----------------------------|
| Labour availability        |                       |                             |
| Too much water (flooding)  |                       |                             |
| Too little water (drought) |                       |                             |
| Access to fertilizer       |                       |                             |
| Temperature                |                       |                             |
|                            |                       |                             |
|                            |                       |                             |
|                            |                       |                             |

k. What limits the productivity of the tanimbary you have?

[prompt until no further factor is mentioned. Rank factors according to importance (top 3 only if more than 3 mentioned)]

| List of factors                          | Mark 'X' if Mentioned | Rank [THREE most important] |
|------------------------------------------|-----------------------|-----------------------------|
| Labour availability                      |                       |                             |
| Too much water (flooding)                |                       |                             |
| Too little water (drought)               |                       |                             |
| Access to fertilizer                     |                       |                             |
| Irrigation infrastructure (barrages etc) |                       |                             |
| Pests                                    |                       |                             |
| Weed                                     |                       |                             |
|                                          |                       |                             |
|                                          |                       |                             |
|                                          |                       |                             |

l. What are the main reasons why you don't have tanimbary?

[prompt until no further factor is mentioned. Rank factors according to importance (top 3 only if more than 3 mentioned)]

| List of factors                   | Mark 'X' if Mentioned | Rank [THREE most important] |
|-----------------------------------|-----------------------|-----------------------------|
| Land availability                 |                       |                             |
| Labour availability               |                       |                             |
| Capital (money to buy/rent land)  |                       |                             |
| Too much water (flooding)         |                       |                             |
| Too little water (drought)        |                       |                             |
| Investment in barrages/irrigation |                       |                             |
| Skill/knowledge (fahaizana)       |                       |                             |

m. Have you considered farming in tanimbary in the future?

[ ] YES >> go to sub-section '4.' [ ] NO >> go to 'n.'

n. What are the main factors stopping you?

[prompt until no further factor is mentioned. Rank factors according to importance (top 3 only if more than 3 mentioned)]

| List of factors                   | Mark 'X' if Mentioned | Rank [THREE most important] |
|-----------------------------------|-----------------------|-----------------------------|
| Land availability                 |                       |                             |
| Labour availability               |                       |                             |
| Capital (money to buy/rent land)  |                       |                             |
| Too much water (flooding)         |                       |                             |
| Too little water (drought)        |                       |                             |
| Investment in barrages/irrigation |                       |                             |
| Skill/knowledge (fahaizana)       |                       |                             |

#### 4. Productivity: Tavy vs Tanimbary

a. Which type of agriculture is more productive (value of crop per unit area)?

[ ] Tavy (from forest) [ ] Tavy (land which has been long cleared) [ ] Tanimbary

b. Which type of agriculture is more productive (value of crop per effort needed in an agricultural season)?

[ ] Tavy (from forest) [ ] Tavy (land which has been long cleared) [ ] Tanimbary

### C. Livestock inputs and outputs

#### 1. Livestock [Input/Output]

|                  | Current Number [double check against HH survey] |              | Inputs [during the past 12 months or period specified for the survey] |      |          |                       | Output [during the past 12 months or period specified for the survey] |                |                |
|------------------|-------------------------------------------------|--------------|-----------------------------------------------------------------------|------|----------|-----------------------|-----------------------------------------------------------------------|----------------|----------------|
|                  | From 1st HH survey                              | Verification | Where pastured?                                                       | Feed | Medicine | Other costs [specify] | Consumption                                                           | Sale (animals) | Sale (Produce) |
| Omby             |                                                 |              |                                                                       |      |          |                       |                                                                       |                |                |
| Kisoa            |                                                 |              |                                                                       |      |          |                       |                                                                       |                |                |
| Akoho            |                                                 |              |                                                                       |      |          |                       |                                                                       |                |                |
| Gana             |                                                 |              |                                                                       |      |          |                       |                                                                       |                |                |
| Gisa             |                                                 |              |                                                                       |      |          |                       |                                                                       |                |                |
| Ondry            |                                                 |              |                                                                       |      |          |                       |                                                                       |                |                |
| Bee hives        |                                                 |              |                                                                       |      |          |                       |                                                                       |                |                |
| Fish tanks/ponds |                                                 |              |                                                                       |      |          |                       |                                                                       |                |                |
| Hafa [inona]     |                                                 |              |                                                                       |      |          |                       |                                                                       |                |                |
| Hafa [inona]     |                                                 |              |                                                                       |      |          |                       |                                                                       |                |                |
| Hafa [inona]     |                                                 |              |                                                                       |      |          |                       |                                                                       |                |                |



**D. Off-farm Income**

1. Apart from farming, what were the main sources of income in your household during the last farming year (2013/2014)? What period did those income flow and how much?

| Persons Involved                                                                                                                      | Sources*                                                                                                                                                                     | Directly or indirectly related to park or protected area?                                                                                                                                                      | Total time involved [specify days or months]                                                                                                                                   | Rate [specify daily, weekly or monthly rate]                                                                                          | Total Income                                                                                                                                                |
|---------------------------------------------------------------------------------------------------------------------------------------|------------------------------------------------------------------------------------------------------------------------------------------------------------------------------|----------------------------------------------------------------------------------------------------------------------------------------------------------------------------------------------------------------|--------------------------------------------------------------------------------------------------------------------------------------------------------------------------------|---------------------------------------------------------------------------------------------------------------------------------------|-------------------------------------------------------------------------------------------------------------------------------------------------------------|
| [Identify the persons involved as HH head or in relation to HH head, and indicate whether the person is an adult (M or F) or a child] | [Specify the source using the code below the table. If a person earns income from more than one source, use a separate row to record information for each source of income.] | [Record with 'YES' or 'NO' whether the source of income in the previous column is directly or indirectly influenced by park or protected area, including any environmental/conservation-related interventions] | [Calculate and record the total number of days worked here for the work that are paid by day. For salaried jobs or jobs paid by months, record total number of months worked.] | [Record the daily wage rate or monthly salary as appropriate clearly specifying the timeframe. For example, ___MGA/day; ___MGA/month] | [If respondents directly report this, for example for 'Remittance', record the figure; for others calculate from the previous two columns and record here.] |
|                                                                                                                                       |                                                                                                                                                                              |                                                                                                                                                                                                                |                                                                                                                                                                                |                                                                                                                                       |                                                                                                                                                             |
|                                                                                                                                       |                                                                                                                                                                              |                                                                                                                                                                                                                |                                                                                                                                                                                |                                                                                                                                       |                                                                                                                                                             |
|                                                                                                                                       |                                                                                                                                                                              |                                                                                                                                                                                                                |                                                                                                                                                                                |                                                                                                                                       |                                                                                                                                                             |
|                                                                                                                                       |                                                                                                                                                                              |                                                                                                                                                                                                                |                                                                                                                                                                                |                                                                                                                                       |                                                                                                                                                             |

\* Some key sources: 1=Daily wage (agricultural); 2=Daily wage (other in-village labour, e.g., cleaning, house building); 3=Daily wage (outside village); 4=Logging (lumberjack); 5=Artisan; 6=Service (govt. or private sector job); 7=Remittance, 8=others (specify).  
 1=spouse (legally married or co-habiting); 2=son/daughter; 3=son/daughter in-law; 4=grandchild; 5=mother/father; 6=mother/father in-law; 7=brother/sister; 8=brother/sister in-law; 9=uncle/aunt; 10=nephew/neice; 11=step/foster child; 12=other family; 13=not related

**E. Questions about teviaala**

[Note: best to ask these questions at the end of the day? Avoid if overly sensitive?]

1. Do you or your HH have the rights to do Teviaala in this area?

[ ] YES >> go to Q 2. [ ] NO >> go to Q 3.

2. Are these rights limited to specific areas on forest?

[ ] YES [ ] NO

3. If Teviaala is being practised or used to be practised in this area, what insitutions regulate, or used to regulate, where, and when HH could do teviaala (e.g. Tangalamena, head of lineage)? [Record any additional information in the box below the table]

| Teviala practices                                                | Regulating Institution(s)                                  | Where one could ddo teviaala?                                              | When one could do teviaala?                                                                     | If cannot practice now, why not?                                                                                  |
|------------------------------------------------------------------|------------------------------------------------------------|----------------------------------------------------------------------------|-------------------------------------------------------------------------------------------------|-------------------------------------------------------------------------------------------------------------------|
| [Record whether 'currently practised' OR 'previously practised'] | [ask & list relevant institutions, both formal & informal] | [ask & record both location and types of land in terms of tenure situation | [ask & record timing as well as conditions that would have to be met to be able to do teviaala] | [ask & record about the restrictions in place and the authorities involved in setting/enforcing the restrictions] |
|                                                                  |                                                            |                                                                            |                                                                                                 |                                                                                                                   |
|                                                                  |                                                            |                                                                            |                                                                                                 |                                                                                                                   |
|                                                                  |                                                            |                                                                            |                                                                                                 |                                                                                                                   |
|                                                                  |                                                            |                                                                            |                                                                                                 |                                                                                                                   |
|                                                                  |                                                            |                                                                            |                                                                                                 |                                                                                                                   |

[Record any additional information about Teviaala practices in the box below]

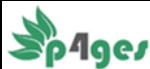

[Start a new sheet for each field]

**A. Basic info about the field and interviews**

[If some of these information already recorded from the HH survey, try to verify here]

|                                                                                                                               |  |
|-------------------------------------------------------------------------------------------------------------------------------|--|
| 1. Field number (from previous sheet)                                                                                         |  |
| 2. Field location (local toponym or description of site/location)                                                             |  |
| 3. Does the HH have formal tenure rights ( <i>vita borne</i> )?                                                               |  |
| 4. Specify the kind of tenure rights you have over this plot (e.g., owned in common, private ownership, customary use rights) |  |
| 5. Was this field cultivated by HH in most recent (2013/2014) agricultural year?                                              |  |
| 6. If not, might any other HH have rights to use this field?                                                                  |  |
| 7. If 'YES', who?                                                                                                             |  |
| [Note: if not cultivated in most recent year, only measure/estimate size and collect clearance/cultivation history]           |  |
| 8. Field visited by researcher and respondent(s)? (1=YES; 0=NO)                                                               |  |
| 9. Field visited but too overgrown to measure? (1=YES; 0=NO)                                                                  |  |

**B. Location and Area**

## 1. GPS boundary waypoints (all plots)

| GPS make and number | Waypoints of field boundary (e.g. 37-43, or 37, 39-43) |
|---------------------|--------------------------------------------------------|
|                     |                                                        |

## 2. deducted reckoning details (small plots only) [Add/remove extra lines as necessary]

|                         | magnetic compass bearing | Distance (with wheel or pacing) |
|-------------------------|--------------------------|---------------------------------|
| Start point             |                          |                                 |
| 1                       |                          |                                 |
| 2                       |                          |                                 |
| 3                       |                          |                                 |
| 4                       |                          |                                 |
| 5                       |                          |                                 |
| 6                       |                          |                                 |
| 7                       |                          |                                 |
| 8                       |                          |                                 |
| 9                       |                          |                                 |
| 10                      |                          |                                 |
| end point back to start |                          |                                 |

## 3. Estimated relative size (for fields not visited)

[If a field is too far away to visit, or too overgrown to measure, size can be estimated by the respondents (if not visited) or the researcher and respondents (if overgrown) relative to fields which have been measured]

| Comparator Field Number | Relative size of this field to comparator (in %) |
|-------------------------|--------------------------------------------------|
|                         |                                                  |
|                         |                                                  |
|                         |                                                  |
|                         |                                                  |

### C. Plot history

1. *First clearance & cultivation history: when was this plot first cleared from the forest (ala velona) and by whom? [Use key events (cyclones, presidents, French colonisation etc)]*

|                                                                                                                            |                                                                                                                                                                                                       |                                                                 |  |
|----------------------------------------------------------------------------------------------------------------------------|-------------------------------------------------------------------------------------------------------------------------------------------------------------------------------------------------------|-----------------------------------------------------------------|--|
| [(Non-)response codes: -98=respondent did not know; -99=respondent did not want to answer; -100=did not ask (specify why)] |                                                                                                                                                                                                       | [use multiple columns to record additional details if reported] |  |
| a. When did the HH start farming this plot?                                                                                |                                                                                                                                                                                                       |                                                                 |  |
| b. Was the plot cleared by members of the HH? (If 'YES', who?)                                                             |                                                                                                                                                                                                       |                                                                 |  |
| c. If not, who cleared the plot?                                                                                           |                                                                                                                                                                                                       |                                                                 |  |
| d. Relation of original clearer to HH head                                                                                 |                                                                                                                                                                                                       |                                                                 |  |
| e. How did the household acquire the plot?                                                                                 | [This information should already be available from the main agricultural HH survey sheet (section B.). Use this opportunity to verify/correct the information in the main agricultural survey sheet.] |                                                                 |  |
| f. Year of first clearance (best guess)                                                                                    |                                                                                                                                                                                                       |                                                                 |  |
| g. Range of uncertainty (if respondent is uncertain, give range of possible years)                                         |                                                                                                                                                                                                       |                                                                 |  |
| h. Did the clearer have a permit from the Foret, or have to pay a bribe                                                    |                                                                                                                                                                                                       |                                                                 |  |
| i. If 'YES', give details                                                                                                  |                                                                                                                                                                                                       |                                                                 |  |

2. *Any other details about the plot & cultivation history*

[use the space below to record any additional information about the plot that is important/relevant to our survey]

3. *Crops planted & cropping frequency*

a. Starting with the most recent farming year on this plot, please tell us which years have you cultivated in this plot and the crops you have grown, for as far back as you can remember.

|                                                             | Latest farming season ( AD) | AD | AD | AD | AD |  |  |
|-------------------------------------------------------------|-----------------------------|----|----|----|----|--|--|
| What crops were planted (when cultivated by the respondent) |                             |    |    |    |    |  |  |

b. How many more times do you think this plot was cultivated before your household started farming in this plot and/or before you can remember?

c. In your knowledge/experience, has there been any change in the number of years this plot is usually left to fallow between cultivated years since this plot was first cleared? If 'YES', could you tell us the usual fallow length in early years and now?

|                              |  |
|------------------------------|--|
| Fallow length in early years |  |
| Fallow length now            |  |

## D. Agricultural Inputs and Outputs

1. Agricultural Inputs - Labour: tell us about the labour used to cultivate this plot during the 2013/2014 agricultural year.

[Note: Use the space under ONE from 'Tavy System', 'Tanimboly' OR 'Tanimbary' as appropriate for this plot, and ignore the other two.]

| Tavy System               | Period | HH Labour     |               |               | External Labour |                                                               |                                                                                            | Other Expenditure |
|---------------------------|--------|---------------|---------------|---------------|-----------------|---------------------------------------------------------------|--------------------------------------------------------------------------------------------|-------------------|
|                           |        | Men           | Women         | Children      | Labour          | Payment Type<br>[Record whether<br>in-kind/Cash/<br>Exchange] | How much?<br>[Record the<br>quantity & uni-<br>ty for 'in-<br>kind'; amount<br>for 'cash'] |                   |
| Kapakapa (Slash)          |        | No / ___ days | No / ___ days | No / ___ days | No / ___ days   |                                                               |                                                                                            |                   |
| Mandoro (Burn)            |        | No / ___ days | No / ___ days | No / ___ days | No / ___ days   |                                                               |                                                                                            |                   |
| Mamboly                   |        | No / ___ days | No / ___ days | No / ___ days | No / ___ days   |                                                               |                                                                                            |                   |
| Miava [1]                 |        | No / ___ days | No / ___ days | No / ___ days | No / ___ days   |                                                               |                                                                                            |                   |
| Miava [2]                 |        | No / ___ days | No / ___ days | No / ___ days | No / ___ days   |                                                               |                                                                                            |                   |
| Miava [3]                 |        | No / ___ days | No / ___ days | No / ___ days | No / ___ days   |                                                               |                                                                                            |                   |
| Miandry Fody              |        | No / ___ days | No / ___ days | No / ___ days | No / ___ days   |                                                               |                                                                                            |                   |
| Misangom-bary             |        | No / ___ days | No / ___ days | No / ___ days | No / ___ days   |                                                               |                                                                                            |                   |
| Mitango katsaka           |        | No / ___ days | No / ___ days | No / ___ days | No / ___ days   |                                                               |                                                                                            |                   |
| Mitango tsaramaso         |        | No / ___ days | No / ___ days | No / ___ days | No / ___ days   |                                                               |                                                                                            |                   |
| Mitaona vary              |        | No / ___ days | No / ___ days | No / ___ days | No / ___ days   |                                                               |                                                                                            |                   |
| Mively vary               |        | No / ___ days | No / ___ days | No / ___ days | No / ___ days   |                                                               |                                                                                            |                   |
| Hafa (inona)              |        | No / ___ days | No / ___ days | No / ___ days | No / ___ days   |                                                               |                                                                                            |                   |
| Hafa (inona)              |        | No / ___ days | No / ___ days | No / ___ days | No / ___ days   |                                                               |                                                                                            |                   |
| Hafa (inona)              |        | No / ___ days | No / ___ days | No / ___ days | No / ___ days   |                                                               |                                                                                            |                   |
| Hafa (inona)              |        | No / ___ days | No / ___ days | No / ___ days | No / ___ days   |                                                               |                                                                                            |                   |
|                           |        |               |               |               |                 |                                                               |                                                                                            |                   |
|                           |        |               |               |               |                 |                                                               |                                                                                            |                   |
| <b>Tanimboly</b>          |        |               |               |               |                 |                                                               |                                                                                            |                   |
| Miava                     |        | No / ___ days | No / ___ days | No / ___ days | No / ___ days   |                                                               |                                                                                            |                   |
| Taillage                  |        | No / ___ days | No / ___ days | No / ___ days | No / ___ days   |                                                               |                                                                                            |                   |
| Maka vokatra<br>[_____]   |        | No / ___ days | No / ___ days | No / ___ days | No / ___ days   |                                                               |                                                                                            |                   |
| Maka vokatra<br>[_____]   |        | No / ___ days | No / ___ days | No / ___ days | No / ___ days   |                                                               |                                                                                            |                   |
|                           |        |               |               |               |                 |                                                               |                                                                                            |                   |
|                           |        |               |               |               |                 |                                                               |                                                                                            |                   |
| <b>Tanimbary</b>          |        |               |               |               |                 |                                                               |                                                                                            |                   |
| Mamadika bainga/<br>benja |        | No / ___ days | No / ___ days | No / ___ days | No / ___ days   |                                                               |                                                                                            |                   |
| Mampiditra rano           |        | No / ___ days | No / ___ days | No / ___ days | No / ___ days   |                                                               |                                                                                            |                   |
| Miosy/Mamakivaky          |        | No / ___ days | No / ___ days | No / ___ days | No / ___ days   |                                                               |                                                                                            |                   |
| Planage                   |        | No / ___ days | No / ___ days | No / ___ days | No / ___ days   |                                                               |                                                                                            |                   |
| Manetsa                   |        | No / ___ days | No / ___ days | No / ___ days | No / ___ days   |                                                               |                                                                                            |                   |
| Miava [1]                 |        | No / ___ days | No / ___ days | No / ___ days | No / ___ days   |                                                               |                                                                                            |                   |
| Miava [2]                 |        | No / ___ days | No / ___ days | No / ___ days | No / ___ days   |                                                               |                                                                                            |                   |
| Miandry Fody              |        | No / ___ days | No / ___ days | No / ___ days | No / ___ days   |                                                               |                                                                                            |                   |
| Mijinja                   |        | No / ___ days | No / ___ days | No / ___ days | No / ___ days   |                                                               |                                                                                            |                   |
| Mitaona vary              |        | No / ___ days | No / ___ days | No / ___ days | No / ___ days   |                                                               |                                                                                            |                   |
| Mively vary               |        | No / ___ days | No / ___ days | No / ___ days | No / ___ days   |                                                               |                                                                                            |                   |
| Hafa (inona)              |        | No / ___ days | No / ___ days | No / ___ days | No / ___ days   |                                                               |                                                                                            |                   |
| Hafa (inona)              |        | No / ___ days | No / ___ days | No / ___ days | No / ___ days   |                                                               |                                                                                            |                   |
| Hafa (inona)              |        | No / ___ days | No / ___ days | No / ___ days | No / ___ days   |                                                               |                                                                                            |                   |

2. Agricultural Inputs - Materials & Other Inputs

| Main Crops | Inputs                                              |                                                |                                       |                                                                 |                                                     |                                      |                                                     |                                      |                                                                                                              |                                                                                  |                                                                               |
|------------|-----------------------------------------------------|------------------------------------------------|---------------------------------------|-----------------------------------------------------------------|-----------------------------------------------------|--------------------------------------|-----------------------------------------------------|--------------------------------------|--------------------------------------------------------------------------------------------------------------|----------------------------------------------------------------------------------|-------------------------------------------------------------------------------|
|            | Seed                                                |                                                | Manure                                |                                                                 | Fertilizer                                          |                                      | Pesticide                                           |                                      | Animals                                                                                                      | Hired equipment                                                                  | Other materials                                                               |
|            | Quantity & Unit<br>[Ask and record Quantity & Unit] | Price<br>[Ask and record price/unit if bought] | Use manure?<br>[Record 'YES' or 'NO'] | If 'YES' was there sufficient manure from the live-stock owned? | Quantity & Unit<br>[Ask and record Quantity & Unit] | Price<br>[Ask and record price/unit] | Quantity & Unit<br>[Ask and record Quantity & Unit] | Price<br>[Ask and record price/unit] | [If hired draught animals were used in land preparation, ploughing, ask and record the cost of renting them] | [If other machinery/equipment were hired, ask and record the cost involved here] | [Ask and record any other cost associated with the farming of this plot here] |
|            |                                                     |                                                |                                       |                                                                 |                                                     |                                      |                                                     |                                      |                                                                                                              |                                                                                  |                                                                               |
|            |                                                     |                                                |                                       |                                                                 |                                                     |                                      |                                                     |                                      |                                                                                                              |                                                                                  |                                                                               |
|            |                                                     |                                                |                                       |                                                                 |                                                     |                                      |                                                     |                                      |                                                                                                              |                                                                                  |                                                                               |
|            |                                                     |                                                |                                       |                                                                 |                                                     |                                      |                                                     |                                      |                                                                                                              |                                                                                  |                                                                               |
|            |                                                     |                                                |                                       |                                                                 |                                                     |                                      |                                                     |                                      |                                                                                                              |                                                                                  |                                                                               |
|            |                                                     |                                                |                                       |                                                                 |                                                     |                                      |                                                     |                                      |                                                                                                              |                                                                                  |                                                                               |
|            |                                                     |                                                |                                       |                                                                 |                                                     |                                      |                                                     |                                      |                                                                                                              |                                                                                  |                                                                               |
|            |                                                     |                                                |                                       |                                                                 |                                                     |                                      |                                                     |                                      |                                                                                                              |                                                                                  |                                                                               |
|            |                                                     |                                                |                                       |                                                                 |                                                     |                                      |                                                     |                                      |                                                                                                              |                                                                                  |                                                                               |
|            |                                                     |                                                |                                       |                                                                 |                                                     |                                      |                                                     |                                      |                                                                                                              |                                                                                  |                                                                               |
|            |                                                     |                                                |                                       |                                                                 |                                                     |                                      |                                                     |                                      |                                                                                                              |                                                                                  |                                                                               |
|            |                                                     |                                                |                                       |                                                                 |                                                     |                                      |                                                     |                                      |                                                                                                              |                                                                                  |                                                                               |
|            |                                                     |                                                |                                       |                                                                 |                                                     |                                      |                                                     |                                      |                                                                                                              |                                                                                  |                                                                               |
|            |                                                     |                                                |                                       |                                                                 |                                                     |                                      |                                                     |                                      |                                                                                                              |                                                                                  |                                                                               |
|            |                                                     |                                                |                                       |                                                                 |                                                     |                                      |                                                     |                                      |                                                                                                              |                                                                                  |                                                                               |
|            |                                                     |                                                |                                       |                                                                 |                                                     |                                      |                                                     |                                      |                                                                                                              |                                                                                  |                                                                               |

3. Agricultural Outputs - Yield, Consumption, Sale

| Main crops | Outputs                           |                                                                                                              |                                                                                                             |                                   |                                                   |                                                                                       |                                  |                                  | Others (Specify) |  |
|------------|-----------------------------------|--------------------------------------------------------------------------------------------------------------|-------------------------------------------------------------------------------------------------------------|-----------------------------------|---------------------------------------------------|---------------------------------------------------------------------------------------|----------------------------------|----------------------------------|------------------|--|
|            | Total yield                       | How would you rate this yield compared to typical yield from this plot?                                      | If the yield has not been typical, how much would be the typical yield in this plot relative to this yield? | HH consumption                    | Sale                                              | In-kind Payment                                                                       | Seed                             |                                  |                  |  |
|            | [Record Reported Quantity & Unit] | [Get the respondents to rate the yield on 5-points scale: 1=very low, 2=low, 3=typical, 4=high, 5=very high] | [Record the relative variation in yield from the typical yield as %]                                        | [Record reported Quantity & Unit] | Quantity<br>[Ask and record Quantity Sold & Unit] | Time & Price<br>[Ask and record when the produce was sold and the price/kg when sold] | [Ask and record Quantity & Unit] | [Ask and record Quantity & Unit] |                  |  |
|            |                                   |                                                                                                              |                                                                                                             |                                   |                                                   |                                                                                       |                                  |                                  |                  |  |
|            |                                   |                                                                                                              |                                                                                                             |                                   |                                                   |                                                                                       |                                  |                                  |                  |  |
|            |                                   |                                                                                                              |                                                                                                             |                                   |                                                   |                                                                                       |                                  |                                  |                  |  |
|            |                                   |                                                                                                              |                                                                                                             |                                   |                                                   |                                                                                       |                                  |                                  |                  |  |
|            |                                   |                                                                                                              |                                                                                                             |                                   |                                                   |                                                                                       |                                  |                                  |                  |  |
|            |                                   |                                                                                                              |                                                                                                             |                                   |                                                   |                                                                                       |                                  |                                  |                  |  |
|            |                                   |                                                                                                              |                                                                                                             |                                   |                                                   |                                                                                       |                                  |                                  |                  |  |
|            |                                   |                                                                                                              |                                                                                                             |                                   |                                                   |                                                                                       |                                  |                                  |                  |  |
|            |                                   |                                                                                                              |                                                                                                             |                                   |                                                   |                                                                                       |                                  |                                  |                  |  |
|            |                                   |                                                                                                              |                                                                                                             |                                   |                                                   |                                                                                       |                                  |                                  |                  |  |
|            |                                   |                                                                                                              |                                                                                                             |                                   |                                                   |                                                                                       |                                  |                                  |                  |  |
|            |                                   |                                                                                                              |                                                                                                             |                                   |                                                   |                                                                                       |                                  |                                  |                  |  |
|            |                                   |                                                                                                              |                                                                                                             |                                   |                                                   |                                                                                       |                                  |                                  |                  |  |
|            |                                   |                                                                                                              |                                                                                                             |                                   |                                                   |                                                                                       |                                  |                                  |                  |  |
|            |                                   |                                                                                                              |                                                                                                             |                                   |                                                   |                                                                                       |                                  |                                  |                  |  |
|            |                                   |                                                                                                              |                                                                                                             |                                   |                                                   |                                                                                       |                                  |                                  |                  |  |

4. *Agricultural Outputs - secondary yield*

a. Did you get any secondary yield from this field in addition to the crops listed above?

[Give examples of 'secondary yields' such as straw that might be used as feed for livestock]

[  ] YES

[  ] NO

b. If 'YES', how much did you obtain in the last farming year?

[Ask and record quantity & unit - OR if sold income from it]

| Quantity | Unit | Income [if sold] |
|----------|------|------------------|
|          |      |                  |
|          |      |                  |
|          |      |                  |
|          |      |                  |

5. *Additional information about the field*

[Use this space to record any additional information relevant to this field that are not captured in earlier sections]

## Work Package 6: Fanadihadiana mahakasika fambolena

### Mahakasika ny fisy fanadihadiana

| Asa                                     | Daty | Ora nanombohana | Ora namaranana | Tompon'andraikitra | Fanamarihana |
|-----------------------------------------|------|-----------------|----------------|--------------------|--------------|
| Fanadihadiana                           |      |                 |                |                    |              |
| Famenoana ny fisy                       |      |                 |                |                    |              |
| Marika fisy                             |      |                 |                |                    |              |
| Fampidirana ny vokatry ny fanadihadiana |      |                 |                |                    |              |
| Fanamarinana fa voadika ny fisy         |      |                 |                |                    |              |

### A. Famaritana ny tokantrano sy toerana fonenany

[Fanamarihana : Akotran'ny fanontaniana faha-6 sy faha-7 vao dia raiso avy amin'ny fanadihadiana teo aloha ary fenoy ny fanontaniana faha -1,2,3,4,5]

|                                                    |  |           |                    |       |
|----------------------------------------------------|--|-----------|--------------------|-------|
| 1. Anaran'ny TK & Marika & Isam-pianakaviana       |  | (Anarana) | _____ (HHID) _____ | Isa   |
| 2. Anaran'ny vohitra & Marika                      |  | (Anarana) |                    | (VID) |
| 3. Anaran'ny fokontany & marika                    |  | (Anarana) |                    | (FID) |
| 4. Anaran'ny kaominina & Marika                    |  | (Anarana) |                    | (CID) |
| 5. Anaran'ny Distrika & Marika                     |  | (Anarana) |                    | (DID) |
| 6. Anaran'ny olona hadihadiana voalohany sy Marika |  | (Anarana) |                    | (PID) |
| 7. Anaran'ny olona hadihadiana faharoa & Marika    |  | (Anarana) |                    | (PID) |
| 8. Toeram-ponenan'ny hadihadiana GPS               |  | (Lat)     |                    | (Lon) |
| 9. Alaviran'ny tanàna                              |  | (Minitra) |                    | (Km)  |

### Olona hadihadiana

[Fanamarihana: ny loham-pianakaviana no anaovana ny fanadihadiana, akotr'izay dia tokony hiresaka amin'ny olon-dehibe mety manana fanazavana hafa na manandanja]

[Raha efa antitra na kilemaina ilay olona tompon-tany hanaovana fanadihadiana, dia afaka ataon'ny olona tanora ao an-tokantrano ny fandrefesana ny tany; ary atao ao an-tokantrano miaraka amin'ilay loham-pianakaviana ihany ny famenoana ny fisy]

[Mariho eto ny mombamomba ny olona hadihadiana raha tsy loham-pianakaviana]





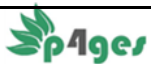

**B. Mahakasika ny tany hajariana**

1. Mahakasika ireo tany ambolena

[ Mety efa azo tany aloha ny valiny sasany amin'ireto fanontaniana manaraka ireto na izany aza anefa dia hamarino indray amin'ity fanadihadiana faharoa ity]

| Nome-raon'ny tany | Anaran'ny toerana | Halavirany miala eo @ toeram-ponenana | velarany | karazany                                                                                             | fomba nahazoana ny tany [Raha 'savoka' ilay tany dia anontanio ihany koa raha fanany manokana na hiombonany amin'ny fianakaviana]     | Nofaina/Nindramina/Novidiana                                                                                                                       | Vidiny/antsipirihan'ny fifanarahana raha nofaina na nindramina na novidiana | nambolena tamin'ny taom-pambolena lasa teo ve? | taonan'ny tany                                                       | Fotoana hanajariana ny tany                                                       |                                                                                                                                                                                                              |
|-------------------|-------------------|---------------------------------------|----------|------------------------------------------------------------------------------------------------------|---------------------------------------------------------------------------------------------------------------------------------------|----------------------------------------------------------------------------------------------------------------------------------------------------|-----------------------------------------------------------------------------|------------------------------------------------|----------------------------------------------------------------------|-----------------------------------------------------------------------------------|--------------------------------------------------------------------------------------------------------------------------------------------------------------------------------------------------------------|
|                   |                   |                                       |          | (1=tavirana tavy;<br>2=lemaka tavy;<br>3=tanimbary ;<br>4=tanimboly ;<br>5=savoka;<br>6=hafa (inona) | (1=lova; 2= nofaina (hazavao);<br>3=novidiana (hazavao);<br>4=nindramina (hazavao);<br>5=nohajararian'ny tokan-trano, 6=hafa (inona)) | [Raha nofaina na novidiana na nindramina ilay tany dia fantaro hoe iza no nahazoany azy, fianakaviana ve sa olonkafa ]<br>(1=fianakaviana; 2=hafa) | Karazana fifanarahana (vola/zavatra)                                        | Sandany                                        | (nampiasaina tamin'ny taom-pambolena 2013/2014)<br>(1=ENY<br>0=TSIA) | [Feny ito ao aorinan'ny fanontiana mahakasika ny tantaran'ilay tany ao amin'ny C] | (Raiso ny elanelan'ny fotoana nampiasaina azy farany sy amin'izao fotoana izao)<br>[raha miala sasatra ilay tany amin'izao fotoana izao, anontanio na raiso hoe hafiriana ny fotoana hialan'ny tany sasatra] |
|                   |                   |                                       |          |                                                                                                      |                                                                                                                                       |                                                                                                                                                    |                                                                             |                                                |                                                                      |                                                                                   |                                                                                                                                                                                                              |
|                   |                   |                                       |          |                                                                                                      |                                                                                                                                       |                                                                                                                                                    |                                                                             |                                                |                                                                      |                                                                                   |                                                                                                                                                                                                              |
|                   |                   |                                       |          |                                                                                                      |                                                                                                                                       |                                                                                                                                                    |                                                                             |                                                |                                                                      |                                                                                   |                                                                                                                                                                                                              |
|                   |                   |                                       |          |                                                                                                      |                                                                                                                                       |                                                                                                                                                    |                                                                             |                                                |                                                                      |                                                                                   |                                                                                                                                                                                                              |
|                   |                   |                                       |          |                                                                                                      |                                                                                                                                       |                                                                                                                                                    |                                                                             |                                                |                                                                      |                                                                                   |                                                                                                                                                                                                              |
|                   |                   |                                       |          |                                                                                                      |                                                                                                                                       |                                                                                                                                                    |                                                                             |                                                |                                                                      |                                                                                   |                                                                                                                                                                                                              |
|                   |                   |                                       |          |                                                                                                      |                                                                                                                                       |                                                                                                                                                    |                                                                             |                                                |                                                                      |                                                                                   |                                                                                                                                                                                                              |
|                   |                   |                                       |          |                                                                                                      |                                                                                                                                       |                                                                                                                                                    |                                                                             |                                                |                                                                      |                                                                                   |                                                                                                                                                                                                              |
|                   |                   |                                       |          |                                                                                                      |                                                                                                                                       |                                                                                                                                                    |                                                                             |                                                |                                                                      |                                                                                   |                                                                                                                                                                                                              |
|                   |                   |                                       |          |                                                                                                      |                                                                                                                                       |                                                                                                                                                    |                                                                             |                                                |                                                                      |                                                                                   |                                                                                                                                                                                                              |
|                   |                   |                                       |          |                                                                                                      |                                                                                                                                       |                                                                                                                                                    |                                                                             |                                                |                                                                      |                                                                                   |                                                                                                                                                                                                              |
|                   |                   |                                       |          |                                                                                                      |                                                                                                                                       |                                                                                                                                                    |                                                                             |                                                |                                                                      |                                                                                   |                                                                                                                                                                                                              |
|                   |                   |                                       |          |                                                                                                      |                                                                                                                                       |                                                                                                                                                    |                                                                             |                                                |                                                                      |                                                                                   |                                                                                                                                                                                                              |
|                   |                   |                                       |          |                                                                                                      |                                                                                                                                       |                                                                                                                                                    |                                                                             |                                                |                                                                      |                                                                                   |                                                                                                                                                                                                              |
|                   |                   |                                       |          |                                                                                                      |                                                                                                                                       |                                                                                                                                                    |                                                                             |                                                |                                                                      |                                                                                   |                                                                                                                                                                                                              |
|                   |                   |                                       |          |                                                                                                      |                                                                                                                                       |                                                                                                                                                    |                                                                             |                                                |                                                                      |                                                                                   |                                                                                                                                                                                                              |
|                   |                   |                                       |          |                                                                                                      |                                                                                                                                       |                                                                                                                                                    |                                                                             |                                                |                                                                      |                                                                                   |                                                                                                                                                                                                              |
|                   |                   |                                       |          |                                                                                                      |                                                                                                                                       |                                                                                                                                                    |                                                                             |                                                |                                                                      |                                                                                   |                                                                                                                                                                                                              |
|                   |                   |                                       |          |                                                                                                      |                                                                                                                                       |                                                                                                                                                    |                                                                             |                                                |                                                                      |                                                                                   |                                                                                                                                                                                                              |
|                   |                   |                                       |          |                                                                                                      |                                                                                                                                       |                                                                                                                                                    |                                                                             |                                                |                                                                      |                                                                                   |                                                                                                                                                                                                              |
|                   |                   |                                       |          |                                                                                                      |                                                                                                                                       |                                                                                                                                                    |                                                                             |                                                |                                                                      |                                                                                   |                                                                                                                                                                                                              |
|                   |                   |                                       |          |                                                                                                      |                                                                                                                                       |                                                                                                                                                    |                                                                             |                                                |                                                                      |                                                                                   |                                                                                                                                                                                                              |

Fanamarihana

2. Mahakasika ny tavy

[Fanamarihana: Araho tsara ireo toromarika isaky ny fanontaniana, indrindra rehefa misy valin-teny ENY/TSIA dia mila arahina sy jerena ireo fanontaniana mety mifampitohy aminy]

a. Inona ny tena olana sedrainareo matetika amin'ny fambolena mahakasika ny tavy?

[Rehefa vita ny famelabelarana nataon'ilay olona hadihadiana dia tariho amin' ireto antony manaraka ireto izy raha sendra mbola tsy voateniny teo aloha. Alaharo araka ny lanjany (ireo telo lehibe ihany raisina raha mihoatra)]

| Antony                                                                                        | Asio 'X' raha io | Alaharo [3 voalohany] |
|-----------------------------------------------------------------------------------------------|------------------|-----------------------|
| tsy fahampian'ny olona miasa (na ny isan'ny afaka miasa ao an-trano/vola hanakaramana)        |                  |                       |
| tsy fahampian'ny fanafody                                                                     |                  |                       |
| tsy fahampian'ny masomboly                                                                    |                  |                       |
| tsy fahasahan'ny tany                                                                         |                  |                       |
| tsy afaka manao tevilala vaovao noho ny fandrarana ara-pomban-drazana                         |                  |                       |
| tsy afaka manao tevilala vaovao noho ny fandraran'ny fanjakana                                |                  |                       |
| tsy afaka manao tevilala vaovao noho ny tsy fisian'ny tany na noho ny fahabetsahan'ny mponina |                  |                       |
|                                                                                               |                  |                       |
|                                                                                               |                  |                       |

b. Inona ny olana tsy ahafahanareo mahazo vokatra tsara amin'ny fambolena?

[Rehefa vita ny famelabelarana nataon'ilay olona hadihadiana dia tariho amin' ireto antony manaraka ireto izy raha sendra mbola tsy voateniny teo aloha. Alaharo araka ny lanjany (ireo telo lehibe ihany raisina raha mihoatra)]

| Antony                                                                           | Asio 'X' raha io | Alaharo [3 voalohany] |
|----------------------------------------------------------------------------------|------------------|-----------------------|
| tsy fahampian'ny olona hiasa (na ny isan'ny hiasa ao an-trano/vola hanakaramana) |                  |                       |
| tsy fahampian'ny fanafody                                                        |                  |                       |
| tsy fahampian'ny masomboly                                                       |                  |                       |
| tsy fahasahan'ny tany                                                            |                  |                       |
| biby manimba voly (bibikely, vorona,)                                            |                  |                       |
| ahi-dratsy                                                                       |                  |                       |
| orana                                                                            |                  |                       |
|                                                                                  |                  |                       |
|                                                                                  |                  |                       |

c. Manana tavy nohajariana tato anatin'ny 5 taona ve ianareo?

[ ] ENY >> jereo '3.'

[ ] TSIA >> jereo'd.'

d. Mieritreritra hanajary tavy hafa fanampiny ve ianareo?

[ ] ENY >> jereo 'e.'

[ ] TSIA >> jereo 'f.'

e. Raha ENY, inona no antony misakana anao tsy hanao izany ?

[Rehefa vita ny famelabelarana nataon'ilay olona hadihadiana dia tariho amin' ireto antony manaraka ireto izy raha sendra mbola tsy voateniny teo aloha. Alaharo araka ny lanjany (ireo telo lehibe ihany raisina raha mihoatra)]

| Antony                                                           | Asio 'X' raha io | Alaharo [3 voalohany] |
|------------------------------------------------------------------|------------------|-----------------------|
| tsy misy tany azo vidiana                                        |                  |                       |
| tsy misy tany afaka hofaina                                      |                  |                       |
| tsy ampy ny olona afaka ampiasaiko hiasa izany tany vaovao izany |                  |                       |
| tsy manam-bola hividianana na hanofaina tany                     |                  |                       |
| tsy afaka manao tevilala mba hahazoana tany hafa ajarahana       |                  |                       |
| lasan'ny mpiavy daholo ny tany                                   |                  |                       |
| mitombo be ny isan'ny olona mampiasa tany                        |                  |                       |
|                                                                  |                  |                       |
|                                                                  |                  |                       |

f. Raha TSIA, inona no antony tsy hahafahanao hanajary tany hafa hanaovana tavy?

[Rehefa vita ny famelabelarana nataon'ilay olona hadihadiana dia tariho amin' ireto antony manaraka ireto izy raha sendra mbola tsy voateniny teo aloha. Alaharo araka ny lanjany (ireo telo lehibe ihany raisina raha mihoatra)]

| Antony                                                           | Asio 'X' raha io | Alaharo [3 voalohany] |
|------------------------------------------------------------------|------------------|-----------------------|
| tsy misy tany azo vidiana                                        |                  |                       |
| tsymisy tany afaka hofaina                                       |                  |                       |
| tsy ampy ny olona afaka ampiasaiko hiasa izany tany vaovao izany |                  |                       |
| tsy manam-bola hividianana na hanofaina tany                     |                  |                       |
| tsy afaka manao tevilala mba hahazoako tany vaovao               |                  |                       |
|                                                                  |                  |                       |
|                                                                  |                  |                       |
|                                                                  |                  |                       |

### 3. Tanimbary

[Fanamarihana: Araho tsara ireo toromarika isaky ny fanontaniana, indrindra rehefa misy valin-teny ENY/TSIA dia mila arahina sy jerena ireo fanontaniana mety mifampitohy aminy]

a. Manana tanimbary ve ianao?

[ ] ENY >> jereo 'b.' [ ] TSIA >> jereo 'l.'

b. Manana tanimbary vao nohajariana tato anatin'ny telo taona ve ianareo?

[ ] ENY >> jereo 'c.' [ ] TSIA >> jereo 'e.'

c. Raha 'ENY', oviana? [mariho izay izy]

[ ] 2012 [ ] 2013 [ ] 2014

d. Inona avy ny fandania betsaka tamin'ny nanajarianao io tanimbary io tany amboalohany? >> jereo 'h.'

| Antony                                                                      | Fandania                           |           |
|-----------------------------------------------------------------------------|------------------------------------|-----------|
|                                                                             | Mpiasa [fitambaran'ny olona miasa] | Sora-bola |
| Fahazoana ilay tany                                                         |                                    |           |
| Fanamboarana ny tanimbary ( fandamahana, fanamboarana ny sisim-parihy,,,) ) |                                    |           |
| Fotodrafitr'asa (fanamboarana lakan-drano, fitsinjarana rano,...)           |                                    |           |
| Hafa (inona)                                                                |                                    |           |
| Hafa (inona)                                                                |                                    |           |
| Hafa (inona)                                                                |                                    |           |
| Hafa (inona)                                                                |                                    |           |

e. Efa nanitatra na nampitombo ny tanim-bary nananao ve ianao raha tato ato?

[ ] ENY >> jereo 'h.' [ ] TSIA >> jereo 'f.'

f. Mieritreritra hanao izany ve ianao ao aoriana?

[ ] ENY >> jereo 'h.' [ ] TSIA >> jereo 'g.'

g. Inona ny antony tsy ahafahanao hanao izany?

[Rehefa vita ny famelabelarana nataon'ilay olona hadihadiana dia tariho amin' ireto antony manaraka ireto izy raha sendra mbola tsy voateniny teo aloha. Alaharo araka ny lanjany (ireo telo lehibe ihany raisina raha mihoatra)]

| Antony                                                                   | Asio 'X' raha io | Alaharo [3 voalohany] |
|--------------------------------------------------------------------------|------------------|-----------------------|
| tsy fisian'ny tany                                                       |                  |                       |
| tsy fisian'ny olona hiasa                                                |                  |                       |
| tsy fahampian'ny ho enti-manana (vola hividiana/na hanofana)             |                  |                       |
| be rano loatra                                                           |                  |                       |
| tsisy rano (maina)                                                       |                  |                       |
| tsy fahampian'ny enti-manana hanangana foto-drafitr'asa (toha-drano,sns) |                  |                       |
| tsy fahaiza-manao                                                        |                  |                       |
|                                                                          |                  |                       |
|                                                                          |                  |                       |

h. Inona no amboleanareo eo amin'ny tanim-barinareo?

[raha manana tanimbary maromaro izy dia raiso daholo ny zavatra amboeny ]

[ ] varin-taona >> jereo'i.' [ ] vary in-2 [ ] vary in-3 [ ] vary & voly avotra (anarana)

[ ] hafa (inona)

i. Mieritreritra ny hanao karazana voly betsaka isan-taona ve ianareo?

[ ] ENY >> jereo 'j.' [ ] TSIA

j. Raha 'ENY', inona avy ireo antony tsy nahafahanao nanao izany?

[Rehefa vita ny famelabelarana nataon'ilay olona hadihadiana dia tariho amin' ireto antony manaraka ireto izy raha sendra mbola tsy voateniny teo aloha. Alaharo araka ny lanjany (ireo telo lehibe ihany raisina raha mihoatra)]

| Antony                    | Asio 'X' raha io | Alaharo [3 voalohany] |
|---------------------------|------------------|-----------------------|
| tsy fisian'ny tany        |                  |                       |
| tsy fisian'ny olona hiasa |                  |                       |
| tsisy rano (maina)        |                  |                       |
| tsisy fanafody            |                  |                       |
| hafanana                  |                  |                       |
|                           |                  |                       |
|                           |                  |                       |

k. Inona no mety sakana tsy ahafahanareo manatsara ny vokatra eny an- tanimbarinareo?

[Rehefa vita ny famelabelarana nataon'ilay olona hadihadiana dia tariho amin' ireto antony manaraka ireto izy raha sendra mbola tsy voateniny teo aloha. Alaharo araka ny lanjany (ireo telo lehibe ihany raisina raha mihoatra)]

| Antony                                                             | Asio 'X' raha io | Alaharo [3 voalohany] |
|--------------------------------------------------------------------|------------------|-----------------------|
| Tsy fahampian'ny olona hiasa                                       |                  |                       |
| Be rano loatra                                                     |                  |                       |
| Tsisy rano                                                         |                  |                       |
| Tsisy zezika                                                       |                  |                       |
| Tsy fisian'ny foto-drafitr'asa hitsinjarana ny rano (barrages etc) |                  |                       |
| Misy biby manimba voly                                             |                  |                       |
| Misy ahi-dratsy                                                    |                  |                       |
|                                                                    |                  |                       |
|                                                                    |                  |                       |



#### D. Velon-tena hafa

1. Akotran'ny fambolena, inona ihany koa ny fidiram-bola hafa ao an-tokantranonareo nandritra ny taom-pambolena (2013/2014)? Oviana no tena nanaovanao izany ary ohatrinona ny vola azo?

| Olona manao ilay asa                                                                                                                                                                               | Loharanom-bola*                                                                                                                                                   | Misy hifandraisany mivantana na ankola-ka amin'ny fiarovana ny ala ve?                                                                                                 | Fotoana lany hanaovana ilay asa [omeo ny isan'ny andro na isan'ny volana]                                                                                                                          | Taha [isan'andro, isan-kerin'andro na isam-bolana]                                                                     | Fitambaran'ny vola miditra                                                                                                                      |
|----------------------------------------------------------------------------------------------------------------------------------------------------------------------------------------------------|-------------------------------------------------------------------------------------------------------------------------------------------------------------------|------------------------------------------------------------------------------------------------------------------------------------------------------------------------|----------------------------------------------------------------------------------------------------------------------------------------------------------------------------------------------------|------------------------------------------------------------------------------------------------------------------------|-------------------------------------------------------------------------------------------------------------------------------------------------|
| [[Iza no olona nanao ilay asa : loham-pianakaviana ve sa tsia? Farito ny fifandraisany na ny fifandraisany amin'ny loham-pianakaviana, mariho ihany koa na olondehibe na ankizy, na lahy na vavy]] | [Raiso hoe inona ilay loharanom-bola araka ireo karazany etsy ambany, Raha toa ka misy loharanom-bola maromaro ny olona iray dia saraho isaky ny andalana vaovao] | [Raiso na " ENY" na "TSIA" ny Raiso raha misy fifandraisana mivantana na tsia ny loharanom-bola sy ny faritra arovana na koa mifandray amin'ny resaka tontolo iainana] | [Kajio ary atambaro ny isan'ny androniasany ho an'ireo mandray karama isan'andro, Ho an'ireo mandray vola isan-kerin'andro na isam-bolana dia kajio ihany koa ny isan'ny herin'andro sy ny volana] | [ Raiso ny karama isan'andro na isam-bolana araka izay hanazavany azy . Ohatra, ___MGA/isan'andro; ___MGA/isam-bolana] | [Raha afaka milaza ilay olona anontaniana hoe mandray vola mitambatra" dia raiso; ho an'ireo hafa dia kajio ny fitambaran'ny vola azo rehe-tra] |
|                                                                                                                                                                                                    |                                                                                                                                                                   |                                                                                                                                                                        |                                                                                                                                                                                                    |                                                                                                                        |                                                                                                                                                 |
|                                                                                                                                                                                                    |                                                                                                                                                                   |                                                                                                                                                                        |                                                                                                                                                                                                    |                                                                                                                        |                                                                                                                                                 |
|                                                                                                                                                                                                    |                                                                                                                                                                   |                                                                                                                                                                        |                                                                                                                                                                                                    |                                                                                                                        |                                                                                                                                                 |
|                                                                                                                                                                                                    |                                                                                                                                                                   |                                                                                                                                                                        |                                                                                                                                                                                                    |                                                                                                                        |                                                                                                                                                 |
|                                                                                                                                                                                                    |                                                                                                                                                                   |                                                                                                                                                                        |                                                                                                                                                                                                    |                                                                                                                        |                                                                                                                                                 |
|                                                                                                                                                                                                    |                                                                                                                                                                   |                                                                                                                                                                        |                                                                                                                                                                                                    |                                                                                                                        |                                                                                                                                                 |
|                                                                                                                                                                                                    |                                                                                                                                                                   |                                                                                                                                                                        |                                                                                                                                                                                                    |                                                                                                                        |                                                                                                                                                 |
|                                                                                                                                                                                                    |                                                                                                                                                                   |                                                                                                                                                                        |                                                                                                                                                                                                    |                                                                                                                        |                                                                                                                                                 |
|                                                                                                                                                                                                    |                                                                                                                                                                   |                                                                                                                                                                        |                                                                                                                                                                                                    |                                                                                                                        |                                                                                                                                                 |
|                                                                                                                                                                                                    |                                                                                                                                                                   |                                                                                                                                                                        |                                                                                                                                                                                                    |                                                                                                                        |                                                                                                                                                 |

\* Karazana fidiram-bola vitsivitsy: 1=saraka an-tsaha (fambolena); 2=karama isan'andro (any amin'ny vohitra , oh., manadio, manao trano); 3=karama isan'andro ( any amin'ny toerana hafa); 4=Mpitrandraka hazo(mpandidy hazo); 5= manao asa tanana, 6=asa birao (fanjakana na tsy miankina ); 7=vola alefan'ny olona ao an-trano. Ho an'ny ankohatra ireo dia raiso mazava tsara .

1=vady(ofisaly na Tsia); 2=zanaka; 3=zanam-bady; 4=zafikely; 5=RAR; 6=Rafozana; 7=Rahalahy/anambavy; 8=zaodahy/zaobavy; 9=dadatao/nenintoa; 10=zanaka anambavy/anadahy; 11=zaza nat-sagana; 12=havana hafa; 13=Tsisy fifandraisana

#### E.Fanontaniana mahakasika teviaala

[Fanamarihana: tsara raha anontaniana any amin'ny faran'ny fanadihadiana mba hialana amin'ny fihafahafan'ilay olona miresaka?]

1. Manana fahafahana hanao teviaala ve ianao na ny tokantrano misy anao ety amin'ity toerana na tanana misy anareo

[ ] ENY >> jereo Q 2.                      [ ] TSIA >> jereo Q 3.

2. Izay fahafahana manao teviaala izay ve dia voafetra amin'ny faritra iray? Jereo 3.

[ ] ENY                                              [ ] TSIA

3. Raha toa ka azo atao ny manao Teviala ety. Iza no manana fahefana hanome alalana hanao izany? Aiza ary isaky ny oviana no afaka manao izany ny tokentranonareo? (oh. Tangalamena, Ray amandrenin'ny tanana)? [Raiso eto amin'ity tabilao ambany ity raha misy fanazavana fanampiny]

| Fotoana nanaovana ilay teviala                                         | Rafitra manome alalana                                            | Aiza no afaka manao ilay teviala?                                                                          | Amin'ny fotoana inona no afaka manao teviala?                                                               | Raha tsy manao teviala intsony amin'izao fotoana izao dia inona ny antony?                                       |
|------------------------------------------------------------------------|-------------------------------------------------------------------|------------------------------------------------------------------------------------------------------------|-------------------------------------------------------------------------------------------------------------|------------------------------------------------------------------------------------------------------------------|
| [Raiso raha fahafahana manao teviala taloha na amin'izao fotoana izao] | [anontanio ireo karazana rafitra na ara-dalana na tsy ara-dalana] | [anontanio na ny toerana na ny karazana tany azo anaovana izany ( tanim-pokonolona, tanim-panjakana, sns)] | [anontanio eto hoe amin'ny fotoana inona no ahafahana manao teviala sy ny fepetra rehetra mifanaraka izany] | [Anontanio ary raiso hoe aiza no mihatra ilay fandrarana ary iza no mametraka sy manara-maso ny fanajana izany ] |
|                                                                        |                                                                   |                                                                                                            |                                                                                                             |                                                                                                                  |
|                                                                        |                                                                   |                                                                                                            |                                                                                                             |                                                                                                                  |
|                                                                        |                                                                   |                                                                                                            |                                                                                                             |                                                                                                                  |
|                                                                        |                                                                   |                                                                                                            |                                                                                                             |                                                                                                                  |
|                                                                        |                                                                   |                                                                                                            |                                                                                                             |                                                                                                                  |
|                                                                        |                                                                   |                                                                                                            |                                                                                                             |                                                                                                                  |
|                                                                        |                                                                   |                                                                                                            |                                                                                                             |                                                                                                                  |
|                                                                        |                                                                   |                                                                                                            |                                                                                                             |                                                                                                                  |
|                                                                        |                                                                   |                                                                                                            |                                                                                                             |                                                                                                                  |

[Raiso eto raha misy fanazavana fanampiny mahakasika ny fanaovana teviala ]

|                                                                                       |
|---------------------------------------------------------------------------------------|
| <b>Work Package 6: Fandihadiana mahakasika ny fambolena</b> FID: _____    HHID: _____ |
|---------------------------------------------------------------------------------------|

|                                                |
|------------------------------------------------|
| <b>[Manova fisy vaovao isaky ny tany iray]</b> |
|------------------------------------------------|

**A. Ny tokony ho fantatra mahakasika ny tany sy ny olona hadihadiana**

(Raha misy amin'ireto efa azo tamin'ny fanadihadiana fototra teo aloha dia avereno hamarinana ihany eto)

|                                                                                                                                                                                                                         |  |
|-------------------------------------------------------------------------------------------------------------------------------------------------------------------------------------------------------------------------|--|
| 1. Nomeraon'ny tany (avy amin'ny fisy voalohany)                                                                                                                                                                        |  |
| 2. Toerana misy ilay tany (fiantson'ny olona eny an-toerana na ny fomba famaritany ilay tany)                                                                                                                           |  |
| 3. Voasoratra ara-dalàna amin'ilay tokantrano ve ilay tany(vita borne)?                                                                                                                                                 |  |
| 4. Afaka faritanao mazava ve izany (oh., fananana iombonana, fanana manokana, fahefana ara-pomban-drazana)                                                                                                              |  |
| 5. Namboly tamin'io tany io ve ilay tokantrano tamin'ny taom-pambolena 2013/2014?                                                                                                                                       |  |
| 6. Raha tsia, misy tokan-trano hafa ve manana fahefana hampiasa ity tany ity?                                                                                                                                           |  |
| 7. Raha 'ENY', iza?                                                                                                                                                                                                     |  |
| <p>[Note: Raha tsy nambolena tao anatin'ny fotoana vitsivitsy, dia refeso na vinavinao ny haben'ny tany ary raiso ny hamaron'ny zava-maniry mandrakotra sy ny karazan'ireo voly natao teo amin'ilay tany teo aloha]</p> |  |
| 8. Niara nijery ilay tany ve ny olona mpanadihady sy ilay olona hadihadiana? (1=ENY; 0=TSIA)                                                                                                                            |  |
| 9. Voatsidika ilay tany fa saingy sarotra ny nandrefy azy noho ny habetsaky ny bozaka sy ahitra eo amin'ilay tany (1=ENY; 0=TSIA)                                                                                       |  |

**B. Famaritana ny velaran'ilay tany sy ny toerana misy azy**

1. Famintinana ireo an-tontanisa azo tamin'ny GPS

|                             |                                                                      |
|-----------------------------|----------------------------------------------------------------------|
| GPS (mari-drefy ampiasaina) | Isa laharan'ny ireo teboka nalaina tao GPS (oh. 37-43, or 37, 39-43) |
|                             |                                                                      |

2. Raha kely ny velaran-tany dia raiso araky ity tabilao ity ny mari-drefy entina mamaritra ny velaran-tany.[ampiasao arak'izay ilaivana azy ny an-dalana amin'ny fandraisana ny teboka]

|                                                            | Refin'ireo zoro (Compas ao GPS) | Refin'ny elanelana nangalana ny teboka tsirairay (ataovy isan'ny dingana mitovy no angalana ny zoro) |
|------------------------------------------------------------|---------------------------------|------------------------------------------------------------------------------------------------------|
| teboka fanombohana                                         |                                 |                                                                                                      |
| 1                                                          |                                 |                                                                                                      |
| 2                                                          |                                 |                                                                                                      |
| 3                                                          |                                 |                                                                                                      |
| 4                                                          |                                 |                                                                                                      |
| 5                                                          |                                 |                                                                                                      |
| 6                                                          |                                 |                                                                                                      |
| 7                                                          |                                 |                                                                                                      |
| 8                                                          |                                 |                                                                                                      |
| 9                                                          |                                 |                                                                                                      |
| 10                                                         |                                 |                                                                                                      |
| teboka famaranana tokony hifandraika amin'ilay fanombohana |                                 |                                                                                                      |

3. Faminavinana ny haben'ny tany tsy voatsidika

[ Raha tena lavitra loatra ilay tany dia azo vinavinain'ilay olona hadihadiana ihany ny refin'ny, fa raha sarotra refesina noho ny ahitra sy kirihitra dia afaka vinavinain'ny mpanadihady sy ny olona hadihadiana ihany raha hoarina amin'ny tany efa voarefy teo aloha]

|                                                      |                                                                             |
|------------------------------------------------------|-----------------------------------------------------------------------------|
| Tany nentina nanoharany ny habehany tany hovinaniana | Refy ankapobeany tany rehefa noharana tamin'ilay tany voarefy teo aloha (%) |
|                                                      |                                                                             |
|                                                      |                                                                             |
|                                                      |                                                                             |



### C. Tantaran'ny tany

1. Nanomboka hatramin'ny nanajariana ilay tany voalohany: Oviana no notevesina voalohany ilay tany? ary iza no nanao izany?[ Ampiasao ireo toe-javatra tena nanamarika ilay fotoana (rivo-doza, fiovary fitondrana (Prezida), fanjanahan-tany,sns)]

|                                                                                                              |                                                                                                                                                     |  |  |
|--------------------------------------------------------------------------------------------------------------|-----------------------------------------------------------------------------------------------------------------------------------------------------|--|--|
| [(Marika ho an'iry mamaly : -98=tsy mahafantata; -99=tsy te hamaly; -100=tsy voanontany (lazao fa maninona)] | [ampiasao ireto handraisana ny antsipirihan-javatra hafa lazain'ilay olona hadihadiana]                                                             |  |  |
| a. Oviana no nanomboka nampiasa ilay tany ilay tokentrano?                                                   |                                                                                                                                                     |  |  |
| b. Ianareo ihany ve no nanajary ilay tany voalohany? (raha 'ENY', iza?)                                      |                                                                                                                                                     |  |  |
| c. Raha TSIA, iza no nanao izany?                                                                            |                                                                                                                                                     |  |  |
| d. Inona ny fifandraisan'nilay olona nanajary voalohany sy ny loham-pianakaviana                             |                                                                                                                                                     |  |  |
| e. Ahoana ny fomba nahazoan'ilay token-trano ilay tany?                                                      | [ Ito dia efa hita amin'ny fanadihadiana mahakasika ny fambolena, ao amin'ny section B fa hanamarino eto raha diso na tsia izay voalaza tany aloha] |  |  |
| f. Taona nanajariana voalohany ilay tany                                                                     |                                                                                                                                                     |  |  |
| g. Raha tsy mahatadidy ilay olona dia raiso ny elanelan'ny fotoana mety nanaovana izany                      |                                                                                                                                                     |  |  |
| h. Ilay olona nitevy ilay ala voalohany ve nahazo alalana tamin'ny fanjakana sa tsy maintsy nanefa honitra   |                                                                                                                                                     |  |  |
| i. Raha 'ENY', omeo ny antsipirihany                                                                         |                                                                                                                                                     |  |  |

2. Antsipirihany hafa mahakasika ilay tany na ny voly nifanesy teo

[Ampiasao ity handraisana ireo fanazavana fanampiny mahakasika ilay toerana, izay hita fa manan-danja na ilaina amin'ny fanadihadiana]

|  |
|--|
|  |
|--|

3. Voly natao teo amin'ilay tany sy ny elanelam-potoana nanaovana izany

a. Atomboy amin'ny taom-pambolena voa aingana indrindra, ary farito koa ireo voly rehetra natao isakin'ny taom-pambolena.

|                                                                                                      | Taom-pambolena<br>Ofarany<br>(_____ AD) | _____ AD | _____ AD | _____ AD | _____ AD |  |  |
|------------------------------------------------------------------------------------------------------|-----------------------------------------|----------|----------|----------|----------|--|--|
| Inona avy ireo karazana voly natao teo amin'ilay tany(izay nataon'ilay tokentrano anontaniana ihany) |                                         |          |          |          |          |  |  |

b. Araka ny fijeriny sy ny fitadidiny dia mety impiry no efa nampiasaina ity tany ity talohan'ny nanaovan'ilay tokentrano fambolena teo?

c. Araka ny fijeriny sy ny traik'efa efa ananan'ilay olona hadihadiana, efa mety niova ve ny halavan'ny fotoana hialan'ilay tany sasatra, nanomboka hatramin'ny voalohany nanajariana azy?

|                                                                  |  |
|------------------------------------------------------------------|--|
| Halavan'ny fotoana hialan'ny tany sasatra teo aloha              |  |
| Halavan'ny fotoana hialan'ny tany sasatra amin'izao fotoana izao |  |

### D. Fandaniana sy fampiasana ny vokatra azo avy amin'ny fambolena

1. Fandaniana makasika ny fambolena - olona niasa: firy ny isan'ny olona niasa ity tany ity tany ity nandritra ny taom-pambolena 2013/2014?

[Fanamarihana: Raiketo eo faritra natokana hoan'izany valin-teny azo ohatra 'Tavy' dia avelao ny faritra 'Tanimboly' OR 'Tanimbary']

| Tavy                  | Fotoana | Olona niasa tao an-tokantrano |                     |                     | Olona nalaina avy any ivelany |                                                |                                                                     | Fandaniana hafa |
|-----------------------|---------|-------------------------------|---------------------|---------------------|-------------------------------|------------------------------------------------|---------------------------------------------------------------------|-----------------|
|                       |         | Lahy                          | Vavy                | Ankizy              | Mpiasa                        | Karazana tambiny<br>[Raiso na vola na zavatra] | Ohatrinona?<br>[Raiso ny fatrany raha zavatra/ny sandany raha vola] |                 |
| Kapakapa              |         | ___ isa / ___ andro           | ___ isa / ___ andro | ___ isa / ___ andro | ___ isa / ___ andro           |                                                |                                                                     |                 |
| Mandoro               |         | ___ isa / ___ andro           | ___ isa / ___ andro | ___ isa / ___ andro | ___ isa / ___ andro           |                                                |                                                                     |                 |
| Mamboly               |         | ___ isa / ___ andro           | ___ isa / ___ andro | ___ isa / ___ andro | ___ isa / ___ andro           |                                                |                                                                     |                 |
| Miava [1]             |         | ___ isa / ___ andro           | ___ isa / ___ andro | ___ isa / ___ andro | ___ isa / ___ andro           |                                                |                                                                     |                 |
| Miava [2]             |         | ___ isa / ___ andro           | ___ isa / ___ andro | ___ isa / ___ andro | ___ isa / ___ andro           |                                                |                                                                     |                 |
| Miandry Fody          |         | ___ isa / ___ andro           | ___ isa / ___ andro | ___ isa / ___ andro | ___ isa / ___ andro           |                                                |                                                                     |                 |
| Misangom-bary         |         | ___ isa / ___ andro           | ___ isa / ___ andro | ___ isa / ___ andro | ___ isa / ___ andro           |                                                |                                                                     |                 |
| Mitango katsaka       |         | ___ isa / ___ andro           | ___ isa / ___ andro | ___ isa / ___ andro | ___ isa / ___ andro           |                                                |                                                                     |                 |
| Mitango tsaramaso     |         | ___ isa / ___ andro           | ___ isa / ___ andro | ___ isa / ___ andro | ___ isa / ___ andro           |                                                |                                                                     |                 |
| Mitaona vary          |         | ___ isa / ___ andro           | ___ isa / ___ andro | ___ isa / ___ andro | ___ isa / ___ andro           |                                                |                                                                     |                 |
| Mively vary           |         | ___ isa / ___ andro           | ___ isa / ___ andro | ___ isa / ___ andro | ___ isa / ___ andro           |                                                |                                                                     |                 |
| Hafa (inona)          |         | ___ isa / ___ andro           | ___ isa / ___ andro | ___ isa / ___ andro | ___ isa / ___ andro           |                                                |                                                                     |                 |
| <b>Tanimboly</b>      |         |                               |                     |                     |                               |                                                |                                                                     |                 |
| Miava                 |         |                               |                     |                     |                               |                                                |                                                                     |                 |
| Taillage              |         | ___ isa / ___ andro           | ___ isa / ___ andro | ___ isa / ___ andro | ___ isa / ___ andro           |                                                |                                                                     |                 |
| Maka vokatra<br>[ ]   |         | ___ isa / ___ andro           | ___ isa / ___ andro | ___ isa / ___ andro | ___ isa / ___ andro           |                                                |                                                                     |                 |
| Maka vokatra<br>[ ]   |         | ___ isa / ___ andro           | ___ isa / ___ andro | ___ isa / ___ andro | ___ isa / ___ andro           |                                                |                                                                     |                 |
| <b>Tanimbary</b>      |         |                               |                     |                     |                               |                                                |                                                                     |                 |
| Mamadika bainga/benja |         | ___ isa / ___ andro           | ___ isa / ___ andro | ___ isa / ___ andro | ___ isa / ___ andro           |                                                |                                                                     |                 |
| Mampiditra rano       |         | ___ isa / ___ andro           | ___ isa / ___ andro | ___ isa / ___ andro | ___ isa / ___ andro           |                                                |                                                                     |                 |
| Miosy/Mamakivaky      |         | ___ isa / ___ andro           | ___ isa / ___ andro | ___ isa / ___ andro | ___ isa / ___ andro           |                                                |                                                                     |                 |
| Planage               |         | ___ isa / ___ andro           | ___ isa / ___ andro | ___ isa / ___ andro | ___ isa / ___ andro           |                                                |                                                                     |                 |
| Manetsa               |         | ___ isa / ___ andro           | ___ isa / ___ andro | ___ isa / ___ andro | ___ isa / ___ andro           |                                                |                                                                     |                 |
| Miava [1]             |         | ___ isa / ___ andro           | ___ isa / ___ andro | ___ isa / ___ andro | ___ isa / ___ andro           |                                                |                                                                     |                 |
| Miava [2]             |         | ___ isa / ___ andro           | ___ isa / ___ andro | ___ isa / ___ andro | ___ isa / ___ andro           |                                                |                                                                     |                 |
| Miandry Fody          |         | ___ isa / ___ andro           | ___ isa / ___ andro | ___ isa / ___ andro | ___ isa / ___ andro           |                                                |                                                                     |                 |
| Mijinja               |         | ___ isa / ___ andro           | ___ isa / ___ andro | ___ isa / ___ andro | ___ isa / ___ andro           |                                                |                                                                     |                 |
| Mitaona vary          |         | ___ isa / ___ andro           | ___ isa / ___ andro | ___ isa / ___ andro | ___ isa / ___ andro           |                                                |                                                                     |                 |
| Mively vary           |         | ___ isa / ___ andro           | ___ isa / ___ andro | ___ isa / ___ andro | ___ isa / ___ andro           |                                                |                                                                     |                 |
| Hafa (inona)          |         | ___ isa / ___ andro           | ___ isa / ___ andro | ___ isa / ___ andro | ___ isa / ___ andro           |                                                |                                                                     |                 |
| Hafa (inona)          |         | ___ isa / ___ andro           | ___ isa / ___ andro | ___ isa / ___ andro | ___ isa / ___ andro           |                                                |                                                                     |                 |



4. *Fampiasana ny vokatra - vokatra miakatra hafa tsy novolena*

a. Mbola misy vokatra hafa alainareo amin'ny tanimboly ve ankoatra ireo vokatra voalaza etsy ambony ireo?

[Ataovy ohatra amin'izany vokatra hafa izany ny vilina ho an'ny biby fiompy]

[  ] ENY[  ] NO

b. Raha 'ENY', firy ny habetsany azonareo tamin'ny taona lasa?

[Anontanio ny lanjany sy ny mari-drefy ampiasainy - na ny vola azo taminy raha namidy]

| Lanja | Mari-drefy | Vola azo [raha namidy] |
|-------|------------|------------------------|
|       |            |                        |
|       |            |                        |
|       |            |                        |
|       |            |                        |

5. *Fanamarihana mahakasika ny vokatra azo*

[ Ampiasao ity banga ity handraisana izay fanazavana hafa mahakasika ny vokatra ankoatra izay rehetra voalaza etsy ambony]

|  |
|--|
|  |
|--|
